# Supplementary material for: Highly efficient blue-green organic light-emitting diodes achieved by controlling the anionic migration of cationic iridium(iii) complexes
Source: Royal Society of Chemistry journal article supplement (doi:10.1039/c6tc01302c), 2016-01-01
Supplement: c6tc01302c1.pdf [file c6tc01302c1.pdf]

### Electronic Supplementary Information

**Scheme S1.** Synthetic routes of the pzpy ligand and complexes 1-4.

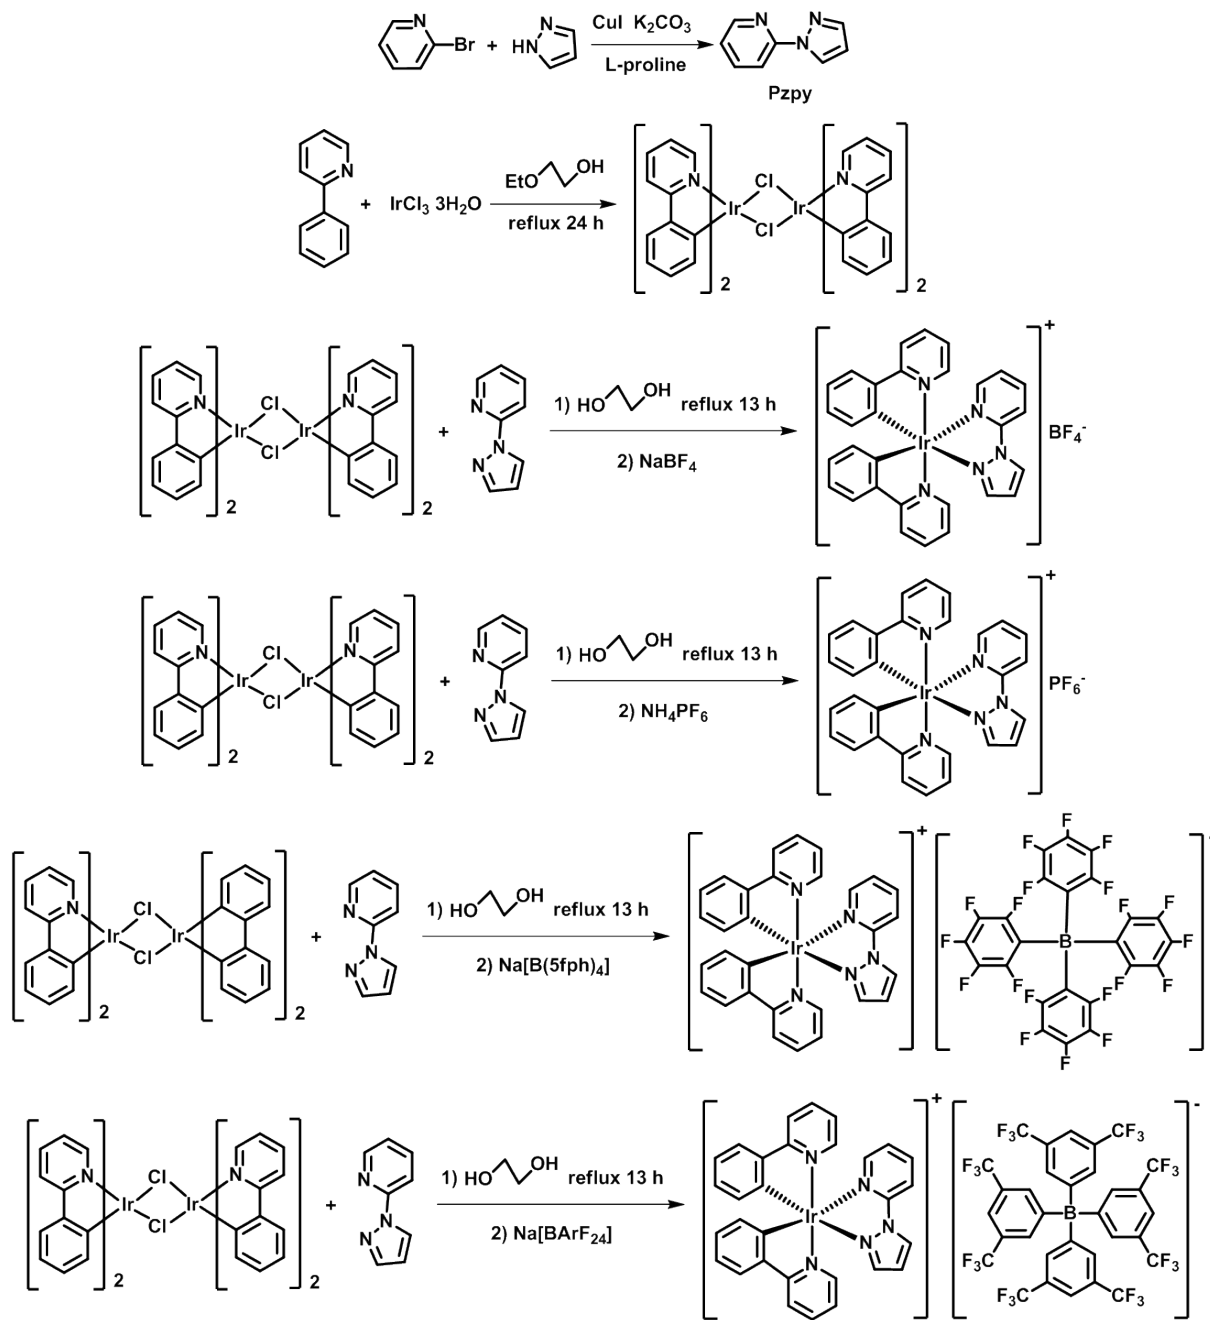

**Figure S1.** Single crystal structure of complex 1. Here thermal ellipsoids are drawn at 30 % probability. The solvent molecules and hydrogen atoms are omitted for clarity. The unlabeled atoms are carbon atoms.

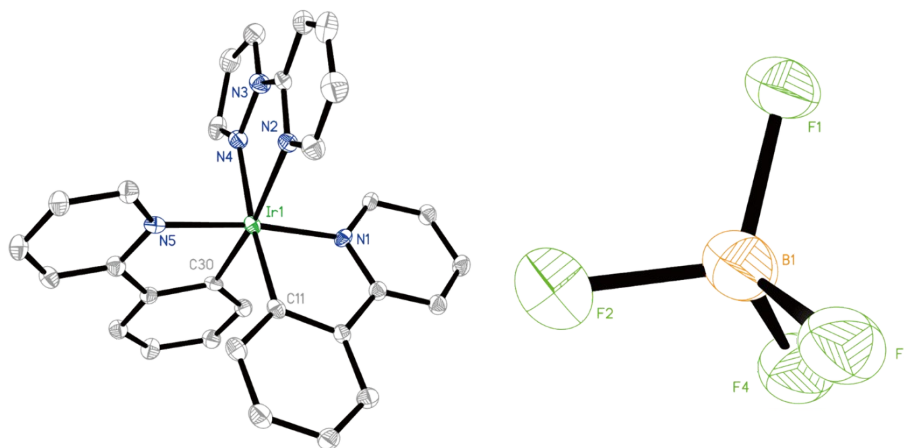

**Figure S2.** Single crystal structure of complex 2. Here thermal ellipsoids are drawn at 30 % probability. The solvent molecules and hydrogen atoms are omitted for clarity. The unlabeled atoms are carbon atoms.

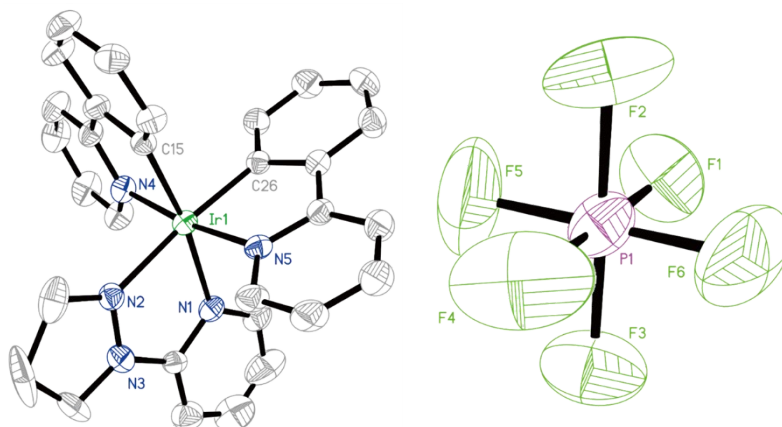

**Figure S3.** Single crystal structure of complex 3. Here thermal ellipsoids are drawn at 30 % probability. The solvent molecules and hydrogen atoms are omitted for clarity. The unlabeled atoms are carbon atoms.

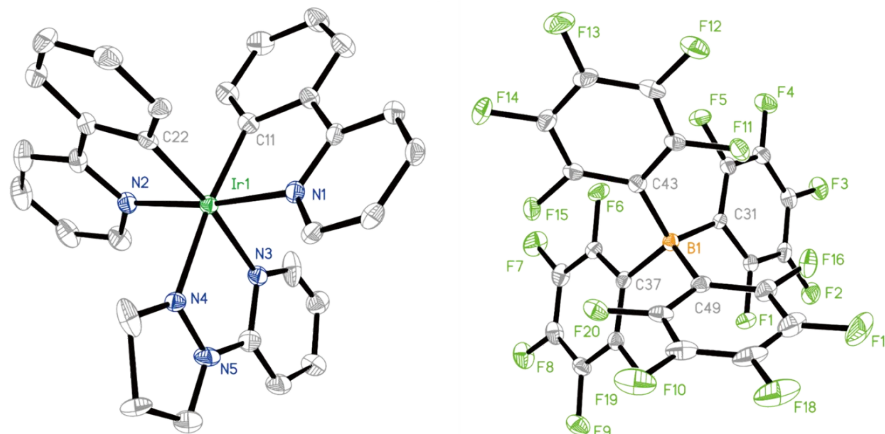

**Figure S4.** Single crystal structure of complex 4. Here thermal ellipsoids are drawn at 30 % probability. The solvent molecules and hydrogen atoms are omitted for clarity. The unlabeled atoms are carbon atoms.

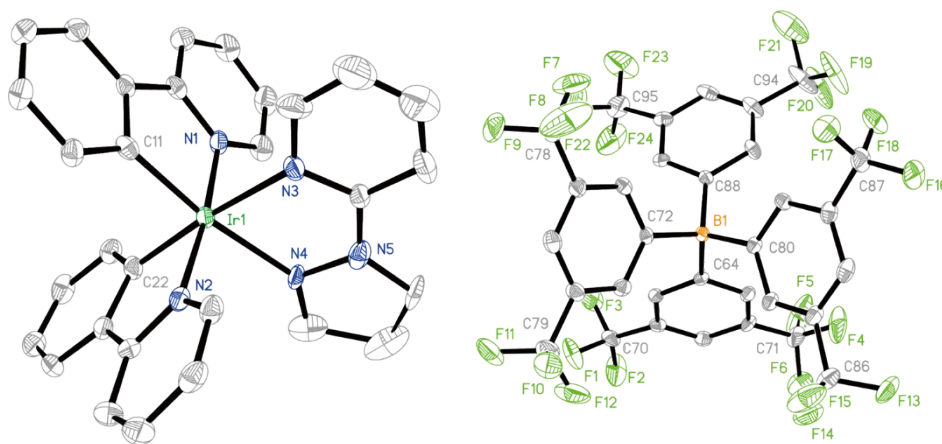

**Figure S5.** Absorption spectra of complexes 1-4 in acetonitrile solution ( $1 \times 10^{-5}$  M).

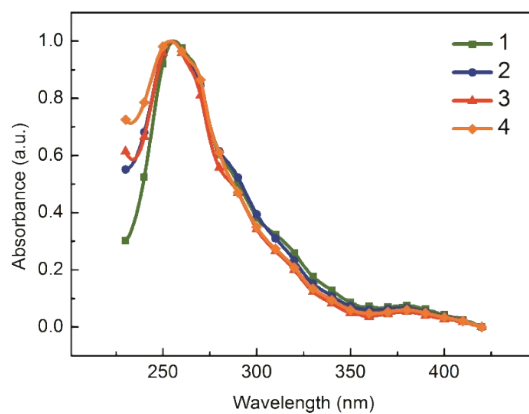

**Figure S6.** Molecular orbital surfaces of the coordinated iridium(III) cation,  $[\text{Ir}(\text{ppy})_2(\text{pzpy})]^+$ . (a) HOMO orbital, (b) LUMO orbital. All the MO surfaces correspond to an isocontour value of  $|\psi| = 0.025$ .

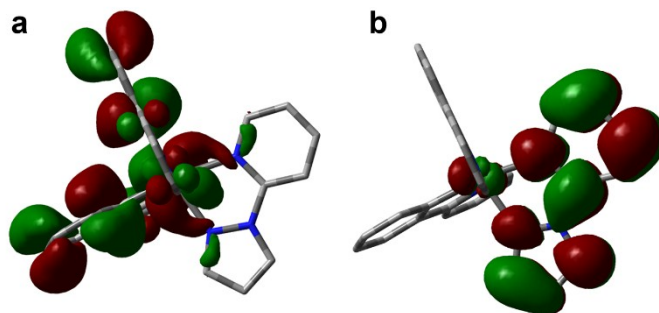

**Figure S7.** (a) *J-V* and (b) *L-V* characteristics of solution-processed OLEDs with a structure of ITO/ PEDOT: PSS (60 nm)/ PVK: OXD-7: *x* wt. % Complex 1 (85 nm)/ Cs<sub>2</sub>CO<sub>3</sub> (2.3 nm)/ Al (150 nm), *x* = 2, 3, 5, 10, 15 or 20. (c) PL spectra of the light-emitting layer, and (d) EL spectra of devices.

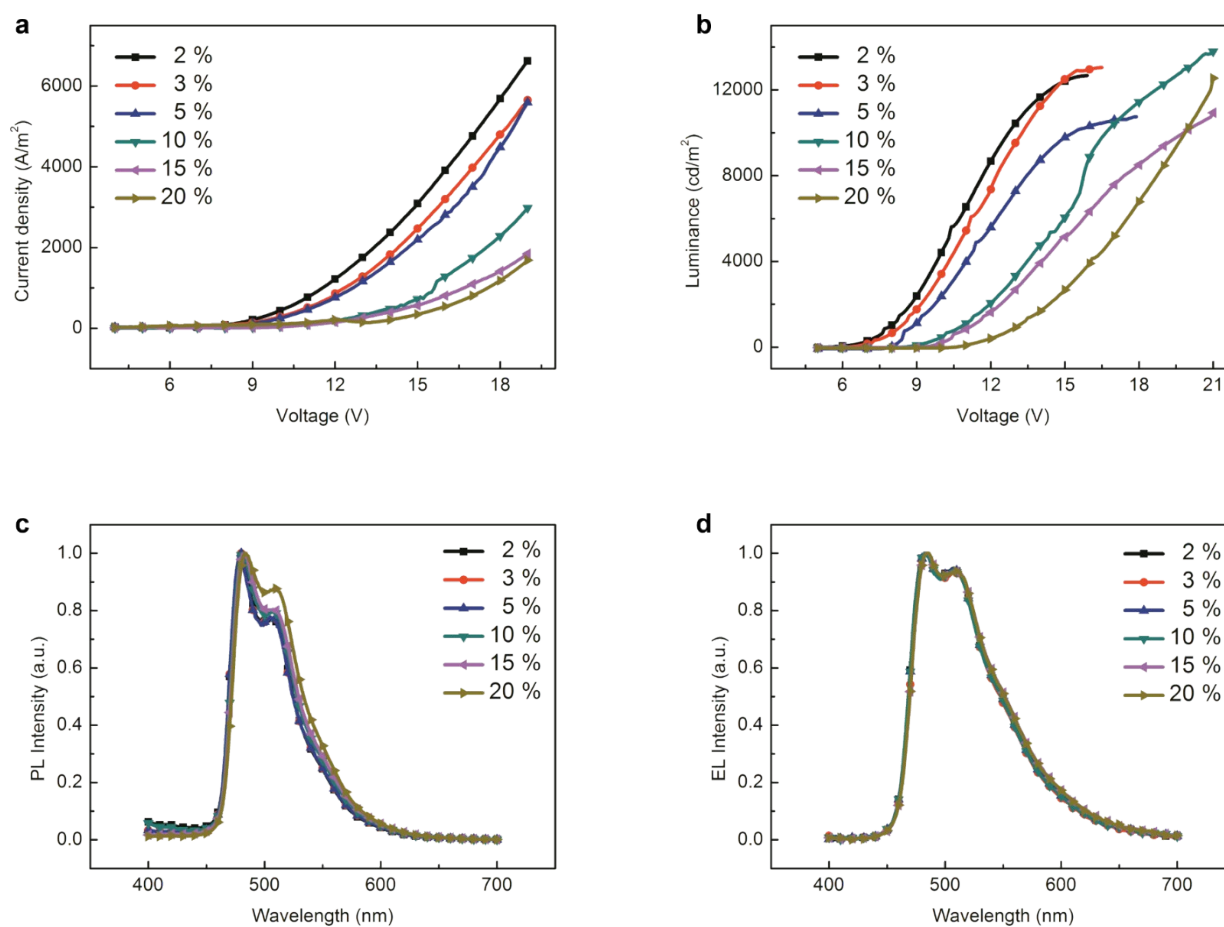

**Figure S8.** (a) *J-V* and (b) *L-V* characteristics of solution-processed OLEDs with a structure of ITO/ PEDOT: PSS (60 nm)/ PVK: OXD-7: *x* wt. % Complex 2 (85 nm)/ Cs<sub>2</sub>CO<sub>3</sub> (2.3 nm)/ Al (150 nm), *x* = 2, 3, 5, 10, 15 or 20. (c) PL spectra of the light-emitting layer, and (d) EL spectra of devices.

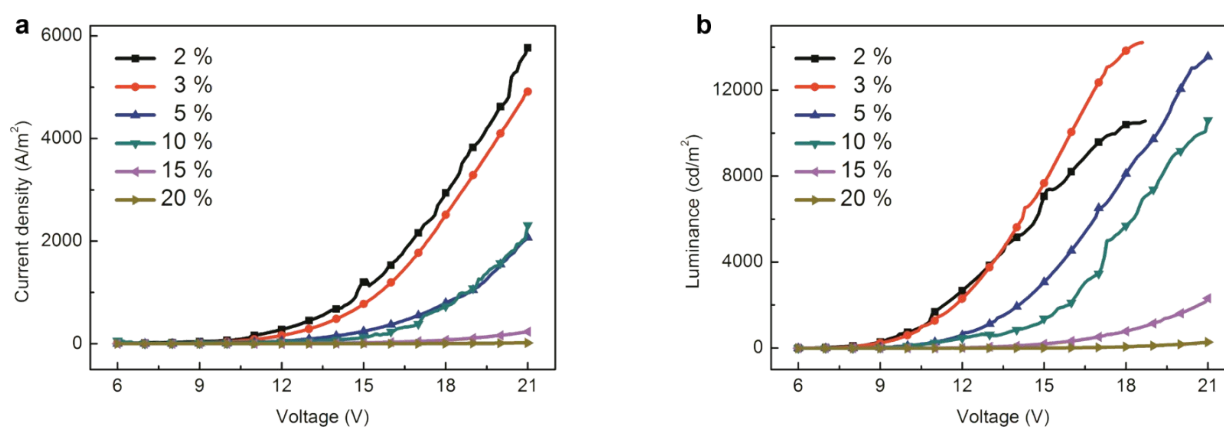

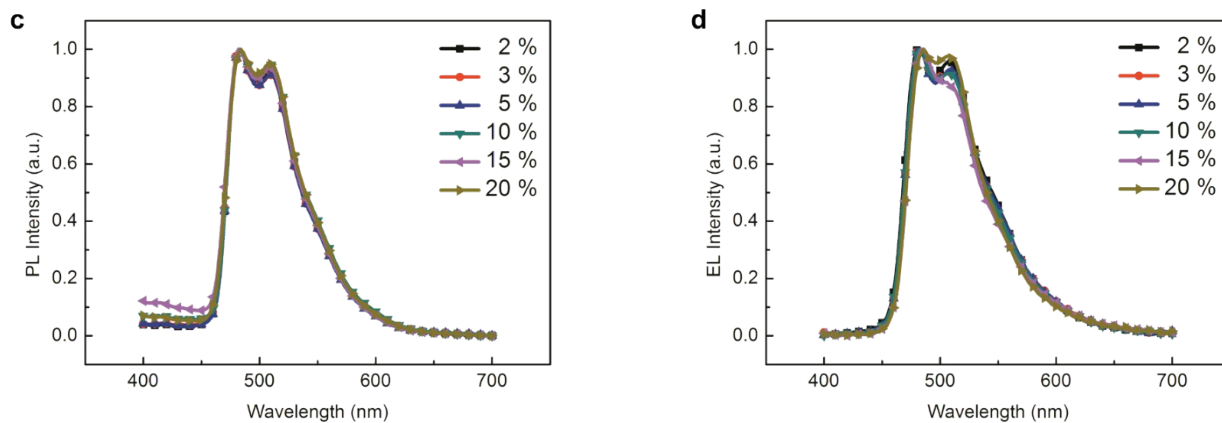

**Figure S9.** (a) *J-V* and (b) *L-V* characteristics of solution-processed OLEDs with a structure of ITO/ PEDOT: PSS (60 nm)/ PVK: OXD-7: *x* wt. % Complex 3 (85 nm)/ Cs<sub>2</sub>CO<sub>3</sub> (2.3 nm)/ Al (150 nm), *x* = 2, 3, 5, 10, 15 or 20. (c) PL spectra of the light-emitting layer, and (d) EL spectra of devices.

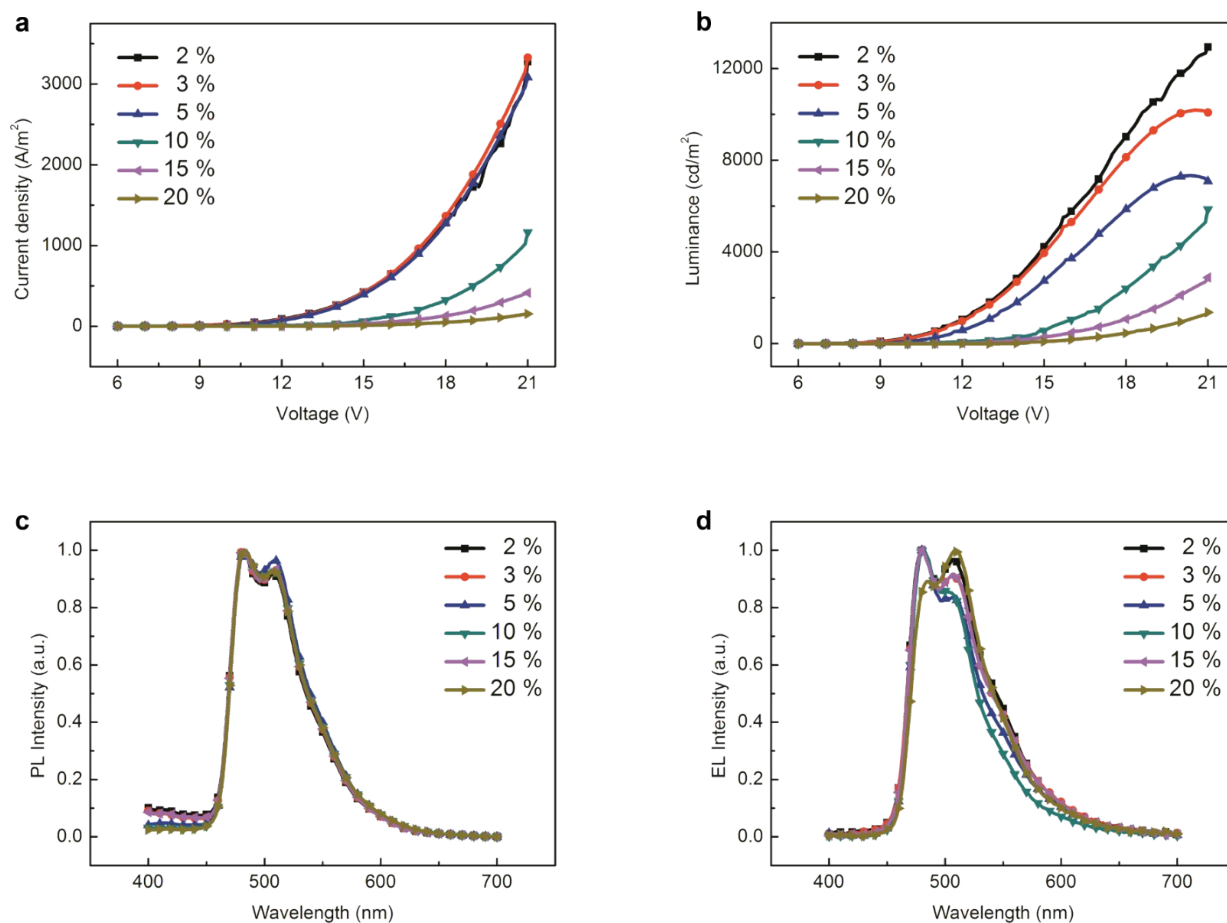

**Figure S10.** (a) *J-V* and (b) *L-V* characteristics of solution-processed OLEDs with a structure of ITO/ PEDOT: PSS (60 nm)/ PVK: OXD-7: *x* wt. % Complex 4 (85 nm)/ Cs<sub>2</sub>CO<sub>3</sub> (2.3 nm)/ Al (150 nm), *x* = 2, 3, 5, 10, 15 or 20. (c) PL spectra of the light-emitting layer, and (d) EL spectra of devices.

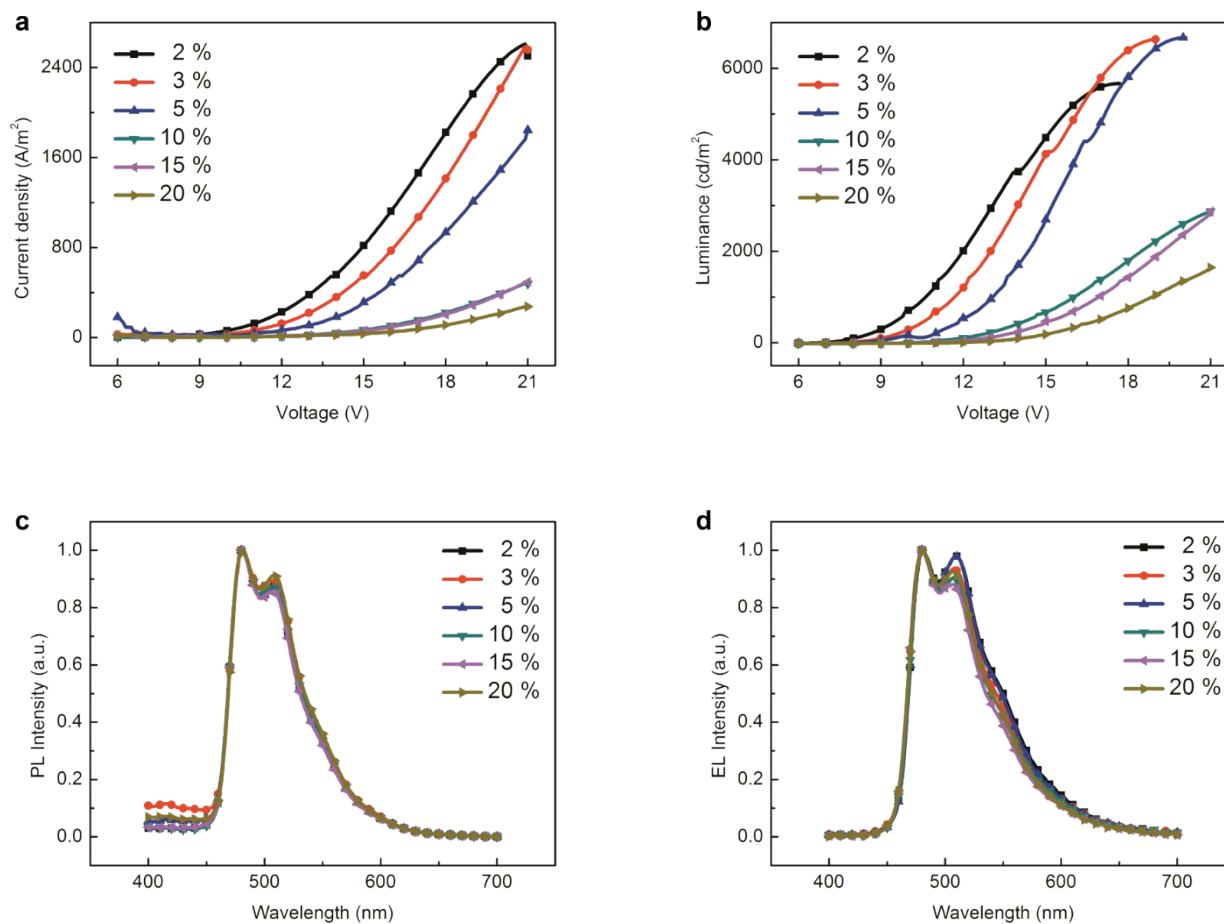

**Table S1.** Summary of reported performance of selected OLEDs based on ionic transition metal complexes (iTMCs).

| iTMCs dopant                                                        | Max <i>CE</i><br>(cd A <sup>-1</sup> ) ( <i>EQE</i> ) <sup>e</sup> | Max <i>L</i><br>(cd m <sup>-2</sup> ) <sup>f</sup> | EL<br>(nm) <sup>g</sup> | <i>CIE</i><br>( <i>x</i> , <i>y</i> ) <sup>h</sup> | Reference |
|---------------------------------------------------------------------|--------------------------------------------------------------------|----------------------------------------------------|-------------------------|----------------------------------------------------|-----------|
| [Ir(ppy) <sub>2</sub> (pzpy)]BF <sub>4</sub>                        | 14.8 (5.8 %)                                                       | 12.5×10 <sup>3</sup>                               | 482, 508 (sh)           | (0.23, 0.48)                                       | This work |
| [Ir(ppy) <sub>2</sub> (pzpy)]PF <sub>6</sub>                        | 17.1 (6.8 %)                                                       | 14.2×10 <sup>3</sup>                               | 482, 508 (sh)           | (0.21, 0.48)                                       | This work |
| [Ir(ppy) <sub>2</sub> (pzpy)][B(5fph) <sub>4</sub> ]                | 13.6 (5.4 %)                                                       | 10.2×10 <sup>3</sup>                               | 480, 506 (sh)           | (0.21, 0.46)                                       | This work |
| [Ir(ppy) <sub>2</sub> (pzpy)][BArF <sub>24</sub> ]                  | 12.4 (4.9 %)                                                       | 5.7×10 <sup>3</sup>                                | 480, 508 (sh)           | (0.21, 0.48)                                       | This work |
| [Ir(dfppy) <sub>2</sub> (pzpy)]PF <sub>6</sub>                      | 2.4                                                                | 995                                                | 458                     | (0.16, 0.28)                                       | 20        |
| [Ir(dfppy) <sub>2</sub> (dppmmi)]PF <sub>6</sub> <sup>a</sup>       | 3.4                                                                | 730                                                | 478                     | (0.20, 0.38)                                       | 26        |
| [Ir(dfppy) <sub>2</sub> (pyim)]PF <sub>6</sub>                      | 0.6 (0.3 %)                                                        | 890                                                | 484                     | (0.21, 0.38)                                       | 21        |
| [Ir(ppy) <sub>2</sub> (dppmmi)]PF <sub>6</sub> <sup>a</sup>         | 3.8                                                                | 1.1×10 <sup>3</sup>                                | 498                     | (0.24, 0.48)                                       | 26        |
| [Ir(dfppy) <sub>2</sub> (bpy)]PF <sub>6</sub>                       | 12.0                                                               | 17.8×10 <sup>3</sup>                               | 517                     | (0.29, 0.58)                                       | 22        |
| [Ir(dfppy) <sub>2</sub> (pybi)]PF <sub>6</sub>                      | 0.5 (0.2 %)                                                        | 730                                                | 516, 548                | (0.37, 0.57)                                       | 21        |
| [Ir(ppy) <sub>2</sub> (pyim)]PF <sub>6</sub>                        | 4.1 (1.3 %)                                                        | 11.5×10 <sup>3</sup>                               | 528                     | (0.35, 0.56)                                       | 21        |
| [Ir(ppy) <sub>2</sub> (bpy)]PF <sub>6</sub>                         | 12.5 (1.48 %)                                                      | Not mentioned                                      | 560                     | Not mentioned                                      | 18        |
| [Ir(L) <sub>2</sub> (N <sup>^</sup> N)]PF <sub>6</sub> <sup>b</sup> | 19.72 (6.48 %)                                                     | 15.6×10 <sup>3</sup>                               | 565                     | (0.44, 0.47)                                       | 19        |
| [Ir(ppy) <sub>2</sub> (pybi)]PF <sub>6</sub>                        | 1.2 (0.4 %)                                                        | 3.6×10 <sup>3</sup>                                | 566                     | (0.47, 0.52)                                       | 21        |
| [Ir(ppy) <sub>2</sub> (qlbi)]PF <sub>6</sub>                        | 0.4 (0.3 %)                                                        | 1.1×10 <sup>3</sup>                                | 618                     | (0.62, 0.38)                                       | 21        |
| [Ir(npy) <sub>2</sub> (c-phen)]PF <sub>6</sub> <sup>a</sup>         | 10.0 (7.1 %)                                                       | 3.2×10 <sup>3</sup>                                | 618                     | (0.57, 0.40)                                       | 24        |
| [Ir(npy) <sub>2</sub> (o-phen)]PF <sub>6</sub> <sup>a</sup>         | 9.1 (6.5 %)                                                        | 2.3×10 <sup>3</sup>                                | 620                     | (0.57, 0.40)                                       | 24        |
| [Cu(dnbp)(DPEphos)]BF <sub>4</sub> <sup>a</sup>                     | 11.0                                                               | 1.5×10 <sup>3</sup>                                | 519                     | Not mentioned                                      | 36        |
| [Cu(phen)(DPEphos)]BF <sub>4</sub> <sup>a</sup>                     | 2.6                                                                | 1.7×10 <sup>3</sup>                                | 555                     | Not mentioned                                      | 36        |
| Os-salt-1 <sup>c</sup>                                              | (0.48 %)                                                           | 1430                                               | 611                     | Not mentioned                                      | 37        |
| Os-salt-2 <sup>d</sup>                                              | 1.9 (2.2 %)                                                        | 870                                                | 637                     | Not mentioned                                      | 37        |

<sup>a</sup> In OLEDs with hole blocking layers. <sup>b</sup> In OLEDs fabricated by vacuum evaporation deposition. <sup>c</sup> short for [Os(II)(4,7-bis(*p*-methoxyphenyl)-1,10-phenanthroline)<sub>2</sub>(*cis*-1,2-bis(diphenylphosphino)ethylene)](tosylate)<sub>2</sub>; <sup>d</sup> short for [Os(II)(4,7-bis(4-naphth-2-ylphenyl)-1,10-phenanthroline)<sub>2</sub>(*cis*-1,2-vinylenebis(diphenylarsine))](PF<sub>6</sub>)<sub>2</sub>. <sup>e</sup> *CE*, current efficiency; *EQE*, external quantum efficiency. <sup>f</sup> *L*, luminance. <sup>g</sup> *EL*, electroluminescence wavelength. <sup>h</sup> *CIE*, Commission Internationale de l'Éclairage.
